# Supplementary material
Source: ML conference proceedings conference paper supplement (https://proceedings.mlr.press/v84/wang18e.html)
Supplement: Supplementary file 1 [file wang18e-supp.pdf]

## APPENDIX: PROOFS

### Proof of Lemma 1

We first prove a technical lemma that bounds the  $\ell_\infty$  norm of error vectors.

**Lemma 4.** *For any  $x \in \mathbb{R}^d$  and  $z_i \in \{\pm 1\}^d$ , with probability  $1 - \mathcal{O}(d^{-3})$  (conditioned on  $x_t$  and  $z_i$ )*

$$\left\| \sum_{i=1}^n \varepsilon_i z_i \right\|_\infty \lesssim \frac{\sigma}{\delta} \sqrt{\frac{\log d}{n}} + H\delta.$$

*Proof.* Let  $\bar{\xi}_i = \xi_i/\delta \sim \mathcal{N}(0, \sigma^2/\delta^2)$ . Consider the following decomposition:

$$\left\| \sum_{i=1}^n \varepsilon_i z_i \right\|_\infty \leq \frac{1}{n\delta} \left\| \sum_{i=1}^n \bar{\xi}_i z_i \right\|_\infty + \delta \cdot \sup_{1 \leq i \leq n} |z_i^\top H_t(\kappa_i, z_i) z_i| \cdot \|z_i\|_\infty.$$

The second term on the right-hand side of the above inequality is upper bounded by  $\mathcal{O}(H\delta)$  almost surely, because  $\|z_i\|_\infty \leq 1$  and  $|z_i^\top H_t(\kappa_i, z_i) z_i| \leq \|H_t(\kappa_i, z_i)\|_1 \|z_i\|_\infty^2 \leq H$ . For the first term, because  $\bar{\xi}_i$  are centered sub-Gaussian random variables independent of  $z_i$  and  $\|z_i\|_\infty \leq 1$ , we have that  $1/n \cdot \left\| \sum_{i=1}^n \bar{\xi}_i z_i \right\|_\infty \lesssim \sqrt{\sigma^2 \log d/n}$  with probability  $1 - \mathcal{O}(d^{-3})$ , by invoking standard sub-Gaussian concentration inequalities.  $\square$

Now define  $\hat{\theta} = (\hat{g}_t, \hat{\mu}_t)$ ,  $\theta_0 = (g_t, \delta^{-1} f(x_t))$  and  $\bar{Z} = (\bar{z}_1, \dots, \bar{z}_n)$  where  $\bar{z}_i = (z_i, 1) \in \mathbb{R}^{d+1}$ . Define also that  $Y = (\tilde{y}_1, \dots, \tilde{y}_n)$ . The estimator can then be written as  $\hat{\theta} = \arg \min_{\theta \in \mathbb{R}^{d+1}} \frac{1}{n} \|Y - \bar{Z}\theta\|_2^2 + \lambda \|\theta\|_1$  where  $\tilde{Y} = \bar{Z}\theta_0 + \varepsilon$ ,  $\varepsilon = (\varepsilon_1, \dots, \varepsilon_n)$ . We first establish a ‘‘basic inequality’’ type results that are essential in performance analysis of Lasso type estimators. By optimality of  $\hat{\theta}$ , we have that

$$\frac{1}{n} \|Y - \bar{Z}\hat{\theta}\|_2^2 + \lambda \|\hat{\theta}\|_1 \leq \frac{1}{n} \|Y - \bar{Z}\theta_0\|_2^2 + \lambda \|\theta_0\|_1 = \frac{1}{n} \|\varepsilon\|_2^2 + \lambda \|\theta_0\|_1.$$

Re-organizing terms we obtain

$$\lambda \|\hat{\theta}\|_1 \leq \lambda \|\theta_0\|_1 + \frac{2}{n} (\hat{\theta} - \theta_0)^\top \bar{Z}^\top \varepsilon.$$

On the other hand, by Hölder’s inequality and Lemma 4 we have, with probability  $1 - \mathcal{O}(d^{-2})$ ,

$$\frac{2}{n} (\hat{\theta} - \theta_0)^\top \bar{Z}^\top \varepsilon \leq 2 \|\hat{\theta} - \theta_0\|_1 \cdot \left\| \frac{1}{n} \bar{Z}^\top \varepsilon \right\|_\infty \lesssim \|\hat{\theta} - \theta_0\|_1 \cdot \left( \frac{\sigma}{\delta} \sqrt{\frac{\log d}{n}} + H\delta \right).$$

Subsequently, if  $\lambda \leq c_0(\sigma\delta^{-1}\sqrt{\log d/n} + H\delta)$  for some sufficiently small  $c_0 > 0$ , we have that  $\|\hat{\theta}\|_1 \leq \|\theta_0\|_1 + 1/2\|\hat{\theta} - \theta_0\|_1$ . Multiplying by 2 and adding  $\|\hat{\theta} - \theta_0\|_1$  on both sides of the inequality we obtain  $\|\hat{\theta} - \theta_0\|_1 \leq 2(\|\hat{\theta} - \theta_0\|_1 + \|\hat{\theta}_0\|_1 - \|\hat{\theta}\|_1)$ . Recall that  $\theta_0$  is sparse and let  $\bar{S} = S \cup \{d+1\}$  be the support of  $\theta_0$ . We then have  $\|(\hat{\theta} - \theta_0)_{\bar{S}^c} + \|(\theta_0)_{\bar{S}^c}\|_1 - \|\hat{\theta}_{\bar{S}^c}\|_1 = 0$  and hence  $\|(\hat{\theta} - \theta_0)_{\bar{S}^c}\|_1 - \|(\hat{\theta} - \theta_0)_{\bar{S}}\|_1 \leq \|\hat{\theta} - \theta_0\|_1 \leq 2\|(\hat{\theta} - \theta_0)_{\bar{S}}\|_1$ . Thus,

$$\|(\hat{\theta} - \theta_0)_{\bar{S}^c}\|_1 \leq 3\|(\hat{\theta} - \theta_0)_{\bar{S}}\|_1. \quad (8)$$

Now consider  $\hat{\theta}$  that minimizes  $\frac{1}{n} \|Y - \bar{Z}\theta\|_2^2 + \lambda \|\theta\|_1$ . By KKT condition we have that

$$\left\| \frac{1}{n} \bar{Z}^\top (Y - \bar{Z}\hat{\theta}) \right\|_\infty \leq \frac{\lambda}{2}.$$

Define  $\hat{\Sigma} = \frac{1}{n} \bar{Z}^\top \bar{Z}$  and recall that  $Y = \bar{Z}\theta_0 + \varepsilon$ . Invoking Lemma 4 and the scaling of  $\lambda$  we have that, with probability  $1 - \mathcal{O}(d^{-2})$

$$\|\hat{\Sigma}(\hat{\theta} - \theta_0)\|_\infty \leq \frac{\lambda}{2} + \left\| \frac{1}{n} \bar{Z}^\top \varepsilon \right\|_\infty \lesssim \frac{\sigma}{\delta} \sqrt{\frac{\log d}{n}} + \delta H. \quad (9)$$

By definition of  $\{\bar{z}_i\}_{i=1}^n$ , we know that  $\widehat{\Sigma}_{jj} = 1$  for all  $j = 1, \dots, d+1$  and  $\mathbb{E}[\widehat{\Sigma}_{jk}] = 0$  for  $j \neq k$ . By Hoeffding's inequality [17] and union bound we have that with probability  $1 - \mathcal{O}(d^{-2})$ ,  $\|\widehat{\Sigma} - I_{(d+1) \times (d+1)}\|_\infty \lesssim \sqrt{\log d/n}$ , where  $\|\cdot\|_\infty$  denotes the maximum absolute value of matrix entries. Also note that  $\widehat{\theta} - \theta_0$  satisfies  $\|(\widehat{\theta} - \theta_0)_{\widehat{S}^c}\|_1 \leq 3\|(\widehat{\theta} - \theta_0)_{\widehat{S}}\|_1$  thanks to Eq. (8). Subsequently,

$$\begin{aligned} \|\widehat{\theta} - \theta_0\|_\infty &\leq \|\widehat{\Sigma}(\widehat{\theta} - \theta_0)\|_\infty + \|(\widehat{\Sigma} - I)(\widehat{\theta} - \theta_0)\|_\infty \\ &\leq \|\widehat{\Sigma}(\widehat{\theta} - \theta_0)\|_\infty + \|\widehat{\Sigma} - I\|_\infty \|\widehat{\theta} - \theta_0\|_1 \\ &\leq \|\widehat{\Sigma}(\widehat{\theta} - \theta_0)\|_\infty + \|\widehat{\Sigma} - I\|_\infty \cdot 4\|(\widehat{\theta} - \theta_0)_{\widehat{S}}\|_1 \\ &\leq \|\widehat{\Sigma}(\widehat{\theta} - \theta_0)\|_\infty + \|\widehat{\Sigma} - I\|_\infty \cdot 4(s+1)\|\widehat{\theta} - \theta_0\|_\infty \\ &\lesssim \frac{\sigma}{\delta} \sqrt{\frac{\log d}{n}} + \delta H + \sqrt{\frac{s^2 \log d}{n}} \cdot \|\widehat{\theta} - \theta_0\|_\infty. \end{aligned} \quad (10)$$

Combining Eq. (10) together with the scaling  $n = \Omega(s^2 \log d)$  we complete the proof of Lemma 1. Note that the statement on the  $\ell_1$  error  $\|\widehat{\theta} - \theta_0\|_1$  is a simple consequence of the basic inequality Eq. (8).

### Proof of Theorem 1

The basis of our algorithm is the analysis of the finite-difference algorithm proposed by [13] under low dimensions. In particular, applying the analysis in [2] for low-dimensional strongly smooth functions, we have for every epoch  $t < s$

$$\mathbb{E}[f(x_t)] - \inf_{x \in \widetilde{\mathcal{X}}, x_{\widehat{S}_t^c} = 0} f(x) \lesssim \text{poly}(s, \sigma, H, \|x_{\widehat{S}_t}^*\|_1) \cdot T^{-1/3},$$

where  $x_t$  is the solution point at the  $t$ th epoch in Algorithm 2 and  $\text{poly}(\cdot)$  is any polynomial function of constant degrees. Recall that  $\|x_{\widehat{S}_t}^*\|_1 \leq \|x^*\|_1 \leq B$  by Assumption (A2). Using Markov's inequality we have that with probability 0.9,

$$f(x_t) - \inf_{x \in \widetilde{\mathcal{X}}, x_{\widehat{S}_t^c} = 0} f(x) \lesssim \text{poly}(s, \sigma, H, \|x_{\widehat{S}_t}^*\|_1) \cdot T^{-1/3}, \quad \forall t = 0, \dots, s. \quad (11)$$

We are now ready to prove Theorem 1. Let  $\widehat{S} = \widehat{S}_t$  be the subset when Algorithm 2 terminates. In the rest of the proof we assume the conclusions in Corollary 1 and Lemma 1 hold, which happens with probability  $1 - \mathcal{O}(d^{-1})$ . Define  $\Delta_S = S \setminus \widehat{S}$ ,  $x^* := \inf_{x \in \mathcal{X}} f(x)$  and  $x_t^* = \inf_{x \in \widetilde{\mathcal{X}}, x_{\widehat{S}_t^c} = 0} f(x)$ . Assumption (A5) implies that  $x^*$  can be chosen such that  $x_{\widehat{S}^c}^* = 0$ . Also, if  $\Delta_S = \emptyset$  we know that  $x_t^* = x^*$  and Theorem 1 automatically holds due to Eq. (11). Therefore in the rest of the proof we shall assume that  $\Delta_S \neq \emptyset$ .

Because  $\Delta_S \neq \emptyset$  and  $|S| = s$ , we must have  $|\widehat{S}_t| < s$ . From the description of Algorithm 2, it can only happen with  $\widehat{S}_t = \widehat{S}_{t-1}$ . We then have that

$$\begin{aligned} f(x_{T+1}) - f(x^*) &= f(x_{t-1}^*) - f(x^*) + f(\widehat{x}_{t-1}) - f(x_{t-1}^*) \\ &\leq f(x_{t-1}^*) - f(x^*) + \text{poly}(s, \sigma, H, \|x^*\|_1) \cdot T^{-1/3} \end{aligned} \quad (12)$$

$$\leq \nabla f(x_{t-1}^*)^\top (x_{t-1}^* - x^*) + \text{poly}(s, \sigma, H, \|x^*\|_1) \cdot T^{-1/3}, \quad (13)$$

where Eq. (12) holds with probability at least 0.9, thanks to Eq. (11). Because  $x_{t-1}^*$  is the minimizer of  $f$  on vectors in  $\widetilde{\mathcal{X}}$  that are supported on  $\widehat{S} = \widehat{S}_{t-1} = \widehat{S}_t$ , and that both  $x_{t-1}^*$  and  $x^*$  truncated on  $\widehat{S}$  are feasible (i.e., in the restrained set  $\widetilde{\mathcal{X}}$ ), it must hold that  $\langle \nabla f(x_{t-1}^*)|_{\widehat{S}}, (x_{t-1}^* - x^*)|_{\widehat{S}} \rangle \leq 0$  by first-order optimality conditions. On the other hand, by Corollary 1 and the definition of  $\widehat{S}_t$ , we have that  $\|\nabla f(x_{t-1}^*)|_{\Delta_S}\|_\infty \leq 2\eta$ . Also note that  $(x^* - x_{t-1}^*)_{\widehat{S}^c} = 0$  and  $[x_{t-1}^*]_{\Delta_S} = 0$ . Subsequently,

$$\nabla f(x_{t-1}^*)^\top (x_{t-1}^* - x^*) \leq |\langle \nabla f(x_{t-1}^*)|_{\Delta_S}, x_{\Delta_S}^* \rangle| \leq \|\nabla f(x_{t-1}^*)|_{\Delta_S}\|_\infty \|x_{\Delta_S}^*\|_1 \leq 2\eta \|x^*\|_1. \quad (14)$$

Combining Eqs. (13,14) and the scalings of  $\eta, \delta, \lambda$  and  $T' = T/2s$  we complete the proof of Theorem 1.

**Proof of Lemma 2**

We use the “full-length” parameterization  $\tilde{\theta}_t = \hat{\theta}_t + \frac{1}{n} \bar{Z}_t^\top (\tilde{Y}_t - \bar{Z}_t \hat{\theta}_t)$ , where  $\hat{\theta}_t$ ,  $\bar{Z}_t$  and  $\tilde{Y}_t$  are notations defined in the proof of Lemma 1 (with subscripts  $t$  added to emphasize that both  $Z_t$  and  $\tilde{Y}_t$  are specific to the  $t$ th epoch in Algorithm 3). Because  $\tilde{Y}_t = \bar{Z}_t \theta_{0t} + \varepsilon_t$  (where  $\theta_{0t} = \nabla f(x_t)$  and  $\varepsilon = (\varepsilon_{t1}, \dots, \varepsilon_{tn})$ , with  $\varepsilon_{ti}$  defined in Eq. (2)). we have

$$\tilde{\theta}_t = \hat{\theta}_t + \frac{1}{n} \bar{Z}_t^\top (\bar{Z}_t \theta_{0t} + \varepsilon_t - \bar{Z}_t \hat{\theta}_t) = \theta_{0t} + \frac{1}{n} \bar{Z}_t^\top \varepsilon_t + (\widehat{\Sigma} - I_{(d+1) \times (d+1)}) (\hat{\theta}_t - \theta_{0t}),$$

where  $\widehat{\Sigma} = \frac{1}{n} \bar{Z}_t^\top \bar{Z}_t$ . Recall that  $\varepsilon_{ti} = \xi_i / \delta + \delta z_i^\top H_t(\kappa_i, z_i) z_i$ . Define  $b_i = z_i^\top H_t(\kappa_i, z_i) z_i$  and  $b = (b_1, \dots, b_n)$ . Also note that the first  $d$  components of  $\tilde{\theta}_t$  are identical to  $\tilde{g}_t$  defined in Eq. (5). Subsequently,

$$\hat{g}_t = g_t + \underbrace{\frac{1}{n\delta} Z_t^\top \xi}_{:= \zeta_t} + \underbrace{\frac{\delta}{n} Z_t^\top b + [(\widehat{\Sigma} - I_{(d+1) \times (d+1)}) (\hat{\theta}_t - \theta_{0t})]_{1:d}}_{:= \gamma_t}. \quad (15)$$

In Eq. (15) we divide  $\hat{g}_t - g_t$  into two terms. We first consider the term  $\zeta_t := \frac{1}{n\delta} Z_t^\top \xi$ . It is clear that  $\mathbb{E}[\zeta_t | x_t] = 0$  because  $\mathbb{E}[\xi | x_t, Z_t] = 0$ . Now consider any  $d$ -dimensional vector  $a \in \mathbb{R}^d$ , and to simplify notations all derivations below are conditioned on  $x_t$ . For any  $i \in [n]$ ,  $z_{ti}^\top a$  are i.i.d. sub-Gaussian random variables with common parameter  $\nu^2 = \|a\|_2^2$ . Also,  $\bar{\xi}_i$  is a sub-Gaussian random variable with parameter  $\sigma^2$  and is independent of  $z_{ti}^\top a$ . Thus, invoking Lemma 6 we have that  $\xi_i z_{ti}^\top a$  is a sub-exponential random variable with parameters  $\nu = \alpha / \sqrt{2} \lesssim \sigma \|a\|_2$ . Consequently,  $\langle \zeta_t, a \rangle = \frac{1}{n\delta} \sum_{i=1}^n \xi_i z_{ti}^\top a$  is a centered sub-exponential random variable with parameters  $\nu = \sqrt{n/2} \cdot \alpha \lesssim \sigma \|a\|_2 / \delta \sqrt{n}$ .

We next consider the term  $\gamma_t = \frac{\delta}{n} Z_t^\top b + (\widehat{\Sigma} - I) (\hat{\theta}_t - \theta_{0t})$ . By Assumption (A3) we know that  $\|b\|_\infty \leq \delta H$ . Subsequently, by Hölder’s inequality we have that

$$\begin{aligned} \|\gamma_t\|_\infty &\leq \frac{\delta}{n} \|Z_t\|_{1,\infty} \|b\|_\infty + \|\widehat{\Sigma} - I\|_\infty \|\hat{\theta}_t - \theta_{0t}\|_1 \\ &\lesssim H\delta + \sqrt{\frac{\log d}{n}} \left( \frac{\sigma s}{\delta} \sqrt{\frac{\log d}{n}} + s\delta H \right). \end{aligned}$$

where the second inequality holds with probability  $1 - \mathcal{O}(d^{-2})$  thanks to Lemma 1.

**Proof of Theorem 2**

We first note that the cumulative regret  $R_{\mathcal{A}}^C(T)$  can be upper bounded as

$$R_{\mathcal{A}}^C(T) \lesssim \left[ \frac{1}{T'} \sum_{t=0}^{T'-1} f(x_t) - f^* \right] + \sup_t \sup_{z \in \{\pm 1\}^d} |f(x_t + \delta z) - f(x_t)|.$$

Because  $\|\nabla f(x)\|_1 \leq H$  for all  $x \in \mathcal{X}$  and  $z \in \{\pm 1\}^d$ , using Hölder’s inequality we have that

$$|f(x_t + \delta z) - f(x_t)| \leq \delta H \lesssim B \left( \frac{s \log^2 d}{T} \right)^{1/4},$$

which is a second-order term. Thus, to prove upper bounds on  $R_{\mathcal{A}}^C(T)$  it suffices to consider only  $\frac{1}{T'} \sum_{t=0}^{T'-1} f(x_t) - f^*$ .

We next cite the result in [22] that gives explicit cumulative regret bounds for mirror descent with approximate gradients:

**Lemma 5** ([22], Lemma 3). *Let  $\|\cdot\|_\psi$  and  $\|\cdot\|_{\psi^*}$  be a pair of conjugate norms, and let  $\Delta_\psi(\cdot, \cdot)$  be a Bregman divergence that is  $\kappa$ -strongly convex with respect to  $\|\cdot\|_\psi$ . Suppose  $f$  is  $\tilde{H}$ -smooth with respect to  $\|\cdot\|_\psi$ , meaning*

that  $f(y) \leq f(x) + \nabla f(x)^\top (y - x) + \frac{\tilde{H}}{2} \|x - y\|_\psi^2$  for all  $x, y \in \mathcal{X}$ , and  $\eta < \kappa/\tilde{H}$ . Define  $g_t = \nabla f(x_t)$ , and let  $x_0, \dots, x_{T'-1}$  be iterations in Algorithm 3. Then for every  $0 \leq t \leq T' - 1$  and any  $x^* \in \tilde{\mathcal{X}}$ ,

$$\eta [f(x_{t+1}) - f(x^*)] + \Delta_\psi(x_{t+1}, x^*) \leq \Delta_\psi(x_t, x^*) + \eta \langle \tilde{g}_t - g_t, x^* - x_t \rangle + \frac{\eta^2 \|\tilde{g}_t - g_t\|_{\psi^*}^2}{2(\kappa - \tilde{H}\eta)}. \quad (16)$$

Adding both sides of Eq. (16) from  $t = 0$  to  $t = T' - 1$ , telescoping and noting that  $\Delta_\psi(x_{T'}, x^*) \geq 0$ , we obtain

$$\frac{1}{T'} \sum_{t=0}^{T'-1} f(x_t) - f(x^*) \leq \frac{\Delta_\psi(x_0, x^*)}{\eta T'} + \frac{1}{T'} \sum_{t=0}^{T'-1} \langle \tilde{g}_t - g_t, x_t - x^* \rangle + \frac{\eta}{2(\kappa - H\eta)} \cdot \sup_{0 \leq t < T'} \|\tilde{g}_t - g_t\|_{\psi^*}^2. \quad (17)$$

Set  $\|\cdot\|_\psi = \|\cdot\|_a$  for  $a = \frac{2 \log d}{2 \log d - 1}$ . It is easy to verify that under Assumption (A3), the function  $f$  satisfies

$$\begin{aligned} f(y) &\geq f(x) + \nabla f(x)^\top (y - x) + H \|y - x\|_\infty^2 \\ &\geq f(x) + \nabla f(x)^\top (y - x) + \tilde{H} \|y - x\|_\psi^2 \end{aligned}$$

for all  $x, y \in \mathcal{X}$  with  $\tilde{H} \leq eH$ , because  $\|x - y\|_1^2 \leq d^{2(1-1/a)} \|x - y\|_a^2 \leq d^{1/\log d} \|x - y\|_1^2 = e \|x - y\|_1^2$  by Hölder's inequality. In addition, by definition of Bregman divergence we have that

$$\Delta_\psi(x_0, x^*) \leq \frac{1}{2(a-1)} \|x^*\|_a^2 \leq \frac{1}{2(a-1)} \|x^*\|_1^2 \leq \|x^*\|_1^2 \log d \leq B^2 \log d, \quad (18)$$

where the first inequality holds because  $\psi_a(x_0) = \psi_a(0) = 0$  and  $\nabla \psi_a(x_0) = \nabla \psi_a(0) = 0$  for  $a > 1$ .

We next upper bound the  $\frac{1}{T'} \sum_{t=0}^{T'-1} \langle \tilde{g}_t - g_t, x^* - x_t \rangle$  and  $\|\tilde{g}_t - g_t\|_{\psi^*}^2$  terms. By Lemma 2 and sub-exponential concentration inequalities (e.g., Lemma 7), we have that with probability  $1 - \mathcal{O}(d^{-1})$

$$\|\tilde{g}_t - g_t\|_\infty \leq \|\zeta_t\|_\infty + \|\gamma_t\|_\infty \lesssim \frac{\sigma}{\delta} \left( \sqrt{\frac{\log d}{n}} + \frac{\log d}{n} \right) + H\delta + \frac{\sigma s \log d}{\delta n} \lesssim \frac{\sigma}{\delta} \sqrt{\frac{\log d}{n}} + H\delta$$

uniformly over all  $t' \in \{0, \dots, T' - 1\}$ , where the last inequality holds because  $n = \Omega(s^2 \log d)$ . Subsequently, by Hölder's inequality we have that

$$\sup_{0 \leq t < T'} \|\tilde{g}_t - g_t\|_{\psi^*}^2 \leq d^{2(a-1)/a} \cdot \sup_{0 \leq t < T'} \|\tilde{g}_t - g_t\|_\infty^2 \lesssim \frac{\sigma^2 \log d}{\delta^2 n} + H^2 \delta^2. \quad (19)$$

We now consider the first term  $\frac{1}{T'} \sum_{t=0}^{T'-1} \langle \tilde{g}_t - g_t, x^* - x_t \rangle \leq \frac{1}{T'} \sum_{t=0}^{T'-1} X_t + \sup_{0 \leq t < T'-1} \|\gamma_t\|_\infty \|x^* - x_t\|_1$ , where  $X_t := \langle \zeta_t, x^* - x_t \rangle$ . By Lemma 2, we know that  $X_t | X_1, \dots, X_{t-1}$  is a centered sub-exponential random variable with parameters  $\nu = \sqrt{n/2} \cdot \alpha \lesssim \sigma \|x^* - x_t\|_2 / \delta \sqrt{n} \lesssim \sigma \|x^*\|_1 / \delta \sqrt{n}$ . Invoking concentration inequalities for sub-exponential martingales ([40], also phrased as Lemma 8 for a simplified version in the appendix) and the definition that  $T' = T/n$ , we have with probability  $1 - \mathcal{O}(d^{-1})$

$$\left| \frac{1}{T'} \sum_{t=0}^{T'-1} \langle \zeta_t, x^* - x_t \rangle \right| \lesssim \frac{\sigma \|x^*\|_1}{\delta} \left( \sqrt{\frac{\log d}{T}} + \frac{\log d}{T} \right) \lesssim \frac{\sigma \|x^*\|_1}{\delta} \sqrt{\frac{\log d}{T}},$$

where the last inequality holds because  $T \geq n = \Omega(s^2 \log d)$ . Thus,

$$\left| \frac{1}{T'} \sum_{t=0}^{T'-1} \langle \tilde{g}_t - g_t, x^* - x_t \rangle \right| \lesssim \frac{\sigma \|x^*\|_1}{\delta} \sqrt{\frac{\log d}{T}} + \|x^*\|_1 \left( H\delta + \frac{\sigma s \log d}{\delta n} \right). \quad (20)$$

Combining Eqs. (18,19,20) with Eq. (17) and taking  $x^*$  to be a minimizer of  $f$  on  $\mathcal{X}$  that satisfies  $\|x^*\|_1 \leq B$ , we obtain

$$\frac{1}{T'} \sum_{t=0}^{T'-1} f(x_t) - f(x^*) \lesssim \frac{\|x^*\|_1^2 \log d}{\eta} \frac{n}{T} + \frac{\sigma \|x^*\|_1}{\delta} \sqrt{\frac{\log d}{T}} + \|x^*\|_1 \left( H\delta + \frac{\sigma s \log d}{\delta n} \right) + \eta \left( \frac{\sigma^2 \log d}{\delta^2 n} + H^2 \delta^2 \right)$$

$$\leq \frac{B^2 \log d}{\eta} \frac{n}{T} + \frac{\sigma B}{\delta} \sqrt{\frac{\log d}{T}} + B \left( H\delta + \frac{\sigma s \log d}{\delta n} \right) + \eta \left( \frac{\sigma^2 \log d}{\delta^2 n} + H^2 \delta^2 \right) \quad (21)$$

with probability  $1 - \mathcal{O}(d^{-1})$ , provided that  $\eta < \kappa/2H = 1/2H$ .

We are now ready to prove Theorem 2. By the conditions we impose on  $T$  and the choices of  $\eta$  and  $n$ , it is easy to verify that  $\eta < 1/2H$ ,  $n = \Omega(s^2 \log d)$  and  $n = \mathcal{O}(T)$ . Subsequently,

$$\begin{aligned} \frac{1}{T'} \sum_{t=0}^{T'-1} f(x_t) - f(x^*) &\lesssim B \sqrt{\frac{n \log d}{T}} + \sigma B \sqrt{\frac{n}{sT}} + B(\sigma + H) \sqrt{\frac{s \log d}{n}} + B \sqrt{\frac{n \log d}{T}} \left( \frac{\sigma^2}{s} + \tilde{\mathcal{O}}(n^{-1}) \right) \\ &\lesssim B \left( \frac{(1+H)^2 s \log^2 d}{T} \right)^{1/4} + \frac{\sigma B \sqrt{(1+H)}}{s^{1/4} T^{1/4}} + \frac{B(\sigma + H)}{\sqrt{1+H}} \left( \frac{s \log^2 d}{T} \right)^{1/4} \\ &\quad + B \left( \frac{(1+H)^2 s \log d}{T} \right)^{1/4} \left( \frac{\sigma^2}{s} + \tilde{\mathcal{O}}(T^{-1/2}) \right) \\ &\lesssim \left( B \sqrt{\log d} + \frac{\sigma B}{\sqrt{s}} + \frac{\sigma^2 B}{s} \right) \left[ \frac{(1+H)^2 s}{T} \right]^{1/4} + B(\sigma + \sqrt{H}) \sqrt{\log d} \left[ \frac{s}{T} \right]^{1/4} + \tilde{\mathcal{O}}(T^{-1/2}) \\ &\lesssim (1 + \sigma + \sigma^2/s) B \sqrt{\log d} \left[ \frac{(1+H)^2 s}{T} \right]^{1/4} + \tilde{\mathcal{O}}(T^{-1/2}). \end{aligned}$$

### Proof of Lemma 3

Using the model Eq. (2) we can decompose  $\tilde{g}_t(\delta) - g_t$  as

$$\begin{aligned} \tilde{g}_t(\delta) - g_t &= \frac{\delta}{2} \mathbb{E}[(z^\top H_t z) z] + \underbrace{\frac{1}{n\delta} Z_t^\top \xi}_{:= \tilde{\zeta}_t(\delta)} + \underbrace{\frac{\delta}{2n} \sum_{i=1}^n (z_i^\top H_t z_i) z_i - \mathbb{E}[(z^\top H_t z) z]}_{:= \tilde{\beta}_t(\delta)} \\ &\quad + \underbrace{\frac{\delta}{2n} \sum_{i=1}^n (z_i^\top (H_t(\delta z_i) - H_t) z_i) z_i}_{:= \tilde{\gamma}_t(\delta)} + \left[ (\hat{\Sigma} - I)(\hat{\theta}_t - \theta_{0t}) \right]_{1:d}, \end{aligned}$$

where  $\hat{\Sigma}$ ,  $\hat{\theta}_t$  and  $\theta_{0t}$  are similarly defined as in the proof of Lemma 2. The sub-exponentiality of  $\langle \tilde{\zeta}_t(\delta), a \rangle$  for any  $a \in \mathbb{R}^d$  is established in Lemma 2. We next consider  $\tilde{\beta}_t(\delta)$ . For any  $a \in \mathbb{R}^d$  consider  $\langle \tilde{\beta}_t(\delta), a \rangle = \frac{\delta}{2n} \sum_{i=1}^n X_i(a)$  where  $X_i(a) = (z_i^\top H_t z_i)(z_i^\top a) - \mathbb{E}[(z_i^\top H_t z_i)(z_i^\top a)]$  are centered i.i.d. random variables conditioned on  $H_t$  and  $x_t$ . In addition,  $|X_i(a)| \leq 2 \|H_t\|_1 \|z_i\|_\infty^2 \cdot \|a\|_1 \|z_i\|_\infty \lesssim H \|a\|_1$  almost surely. Therefore,  $X_i(a)$  is a sub-Gaussian random variable with parameter  $\nu = H \|a\|_1$ , and hence  $\langle \tilde{\beta}_t(\delta), a \rangle$  is a sub-Gaussian random variable with parameter  $\nu = \delta H \|a\|_1 / \sqrt{n}$ . Finally, for the deterministic term  $\tilde{\gamma}_t(\delta)$ , we have that

$$\begin{aligned} \|\tilde{\gamma}_t(\delta)\|_\infty &\leq \frac{\delta}{2} \sup_{z \in \{\pm 1\}^d} \|H_t(\delta z) - H_t\|_1 \|z\|_\infty^2 + \|(\hat{\Sigma} - I)(\hat{\theta}_t - \theta_{0t})\|_\infty \\ &\leq \frac{\delta}{2} \sup_{z \in \{\pm 1\}^d} L \cdot \|\delta z\|_\infty \|z\|_\infty^2 + \|\hat{\Sigma} - I\|_{\max} \|\hat{\theta}_t - \theta_{0t}\|_\infty \\ &\lesssim L \delta^2 + \sqrt{\frac{\log d}{n}} \left( \frac{\sigma s}{\delta} \sqrt{\frac{\log d}{n}} + s \delta H \right) \\ &\lesssim L \delta^2 + \frac{\sigma s \log d}{n \delta} + s \delta H \sqrt{\frac{\log d}{n}}. \end{aligned}$$

### Proof of Theorem 3

Because  $f$  is convex,  $R_{\mathcal{A}}^S(T) = f(x_{T+1}) - f^* \leq \frac{1}{T'} \sum_{t=0}^{T'-1} f(x_t) - f^*$ . Thus it suffices to upper bound  $\frac{1}{T'} \sum_{t=0}^{T'-1} f(x_t) - f(x^*)$ , where  $x^* \in \mathcal{X}$ ,  $\|x^*\|_1 \leq B$  is a minimizer of  $f$  over  $\mathcal{X}$ . Using the strategy in the proof of Theorem 2, this amounts to upper bound (with high probability)  $\|\tilde{g}_t^{\text{tw}} - g_t\|_{\psi^*}^2$  and  $\frac{1}{T'} \sum_{t=0}^{T'-1} \langle \tilde{g}_t^{\text{tw}} - g_t, x^* - x_t \rangle$ .

For the first term, using sub-exponentiality of  $\tilde{\zeta}_t$  and sub-gaussianity of  $\tilde{\beta}_t$ , we have with probability  $1 - \mathcal{O}(d^{-1})$  uniformly over all  $t \in \{0, \dots, T' - 1\}$ ,

$$\begin{aligned} \|\tilde{g}_t^{\text{tw}} - g_t\|_\infty &\leq \|\tilde{\zeta}_t\|_\infty + \|\tilde{\beta}_t\|_\infty + \|\tilde{\gamma}_t\|_\infty \\ &\lesssim \frac{\sigma}{\delta} \left( \sqrt{\frac{\log d}{n}} + \frac{\log d}{n} \right) + \delta H \sqrt{\frac{\log d}{n}} + L\delta^2 + H\delta \sqrt{\frac{s^2 \log d}{n}} + \frac{\sigma s \log d}{\delta n} \\ &\lesssim \left( \frac{\sigma}{\delta} + s\delta H \right) \sqrt{\frac{\log d}{n}} + L\delta^2, \end{aligned}$$

where the last inequality holds because  $n = \Omega(s^2 \log d)$ . Subsequently, with probability  $1 - \mathcal{O}(d^{-1})$

$$\sup_{0 \leq t \leq T'-1} \|\tilde{g}_t^{\text{tw}} - g_t\|_{\psi^*}^2 \lesssim \left( \frac{\sigma^2}{\delta^2} + s^2 \delta^2 H^2 \right) \frac{\log d}{n} + L^2 \delta^4. \quad (22)$$

For the other term  $\frac{1}{T'} \sum_{t=0}^{T'-1} \langle \tilde{g}_t^{\text{tw}} - g_t, x^* - x_t \rangle$ , again using concentration inequalities of sub-exponential/sub-Gaussian martingales and noting that  $\|x^* - x_t\|_2 \leq \|x^* - x_t\|_1 \leq 2B$ , we have

$$\begin{aligned} \frac{1}{T'} \sum_{t=0}^{T'-1} \langle \tilde{g}_t^{\text{tw}} - g_t, x^* - x_t \rangle &= \frac{1}{T'} \sum_{t=0}^{T'-1} \langle \tilde{\zeta}_t + \tilde{\beta}_t + \tilde{\gamma}_t, x^* - x_t \rangle \\ &\lesssim \left( \frac{\sigma}{\delta} + s\delta H \right) B \sqrt{\frac{\log d}{T}} + B \left( L\delta^2 + \frac{\sigma s \log d}{\delta n} + s\delta H \sqrt{\frac{\log d}{n}} \right). \end{aligned} \quad (23)$$

Subsequently, combining Eqs. (22,23) with Eq. (17) we have

$$\begin{aligned} \frac{1}{T'} \sum_{t=0}^{T'-1} f(x_t) - f(x^*) &\lesssim \frac{B^2 \log d}{\eta} \frac{n}{T} + \left( \frac{\sigma}{\delta} + s\delta H \right) B \sqrt{\frac{\log d}{T}} + (B + \eta) \left( L\delta^2 + \frac{\sigma s \log d}{\delta n} + s\delta H \sqrt{\frac{\log d}{n}} \right) \\ &\quad + \eta \left( \frac{\sigma^2}{\delta^2} + s^2 \delta^2 H^2 \right) \frac{\log d}{n} + \eta L^2 \delta^4. \end{aligned} \quad (24)$$

We are now ready to prove Theorem 3. It is easy to verify that with the condition imposed on  $T$  and the selection of  $\eta$  and  $n$ , it holds that  $\eta < 1/2H$ ,  $n = \Omega(s^2 \log d)$  and  $n \leq T/10$ . Subsequently,

$$\begin{aligned} &\frac{1}{T'} \sum_{t=0}^{T'-1} f(x_t) - f(x^*) \\ &\lesssim Bn^{1/3} \sqrt{\frac{\log d}{T}} + \left[ \sigma \left( \frac{n}{s \log d} \right)^{1/3} + \tilde{\mathcal{O}}(n^{-1/3}) \right] B \sqrt{\frac{\log d}{T}} + \left( B + \tilde{\mathcal{O}} \left( \frac{n^{2/3}}{\sqrt{T}} \right) \right) \left[ (L + \sigma) \left( \frac{s \log d}{n} \right)^{2/3} + \tilde{\mathcal{O}}(n^{-5/6}) \right] \\ &\quad + Bn^{2/3} \sqrt{\frac{\log d}{T}} \left( \sigma^2 \left( \frac{n}{s \log d} \right)^{2/3} + \tilde{\mathcal{O}}(n^{-2/3}) \right) \frac{\log d}{n} + Bn^{2/3} \sqrt{\frac{\log d}{T}} L^2 \left( \frac{s \log d}{n} \right)^{4/3} \\ &\lesssim Bn^{1/3} \sqrt{\frac{\log d}{T}} + \sigma B \left( \frac{n}{s \log d} \right)^{1/3} \sqrt{\frac{\log d}{T}} + B(L + \sigma) \left( \frac{s \log d}{n} \right)^{2/3} + \sigma^2 B \left( \frac{n}{s^2 \log^2 d} \right)^{1/3} \sqrt{\frac{\log d}{T}} + \tilde{\mathcal{O}}(T^{-5/12}) \\ &\lesssim \left( B\sqrt{\log d} + \frac{\sigma B\sqrt{\log d}}{s^{1/3}} + \frac{\sigma^2 B\sqrt{\log d}}{s^{2/3}} \right) \left[ \frac{(1+L)s^{2/3}}{T} \right]^{1/3} + \frac{B(L+\sigma)}{(1+L)^{2/3}} \left( \frac{s^{2/3} \log d}{T} \right)^{1/3} + \tilde{\mathcal{O}}(T^{-5/12}) \\ &\lesssim \left( B\sqrt{\log d} + \frac{\sigma B\sqrt{\log d}}{s^{1/3}} + \frac{\sigma^2 B\sqrt{\log d}}{s^{2/3}} \right) \left[ \frac{(1+L)s^{2/3}}{T} \right]^{1/3} + B\sigma \sqrt{\log d} \left( \frac{(1+L)s^{2/3}}{T} \right)^{1/3} + \tilde{\mathcal{O}}(T^{-5/12}) \\ &\lesssim (1 + \sigma + \sigma^2/s^{2/3}) B \sqrt{\log d} \left( \frac{(1+L)s^{2/3}}{T} \right)^{1/3} + \tilde{\mathcal{O}}(T^{-5/12}). \end{aligned}$$

### Additional tail inequalities

**Lemma 6.** *Suppose  $X$  and  $Y$  are centered sub-Gaussian random variables with parameters  $\nu_1^2$  and  $\nu_2^2$ , respectively. Then  $XY$  is a centered sub-exponential random variable with parameter  $\nu = \sqrt{2}v$  and  $\alpha = 2v$ , where  $v = 2e^{2/e+1}\nu_1\nu_2$ .*

*Proof.*  $XY$  is clearly centered because  $\mathbb{E}XY = \mathbb{E}X \cdot \mathbb{E}Y = 0$ , thanks to independence. We next bound  $\mathbb{E}[|XY|^k]$  for  $k \geq 3$  (i.e., verification of the Bernstein's condition). Because  $X$  and  $Y$  are independent, we have that  $\mathbb{E}[|XY|^k] = \mathbb{E}|X|^k \cdot \mathbb{E}|Y|^k$ . In addition, because  $X$  is a centered sub-Gaussian random variable with parameter  $\nu_1^2$ , it holds that  $(\mathbb{E}|X|^k)^{1/k} \leq \nu_1 e^{1/e} \sqrt{k}$ . Similarly,  $(\mathbb{E}|Y|^k)^{1/k} \leq \nu_2 e^{1/e} \sqrt{k}$ . Subsequently,

$$\mathbb{E}|XY|^k \leq \left(e^{2/e}\nu_1\nu_2\right)^k \cdot k^k \leq \left(e^{2/e}\nu_1\nu_2\right)^k \cdot e^k k! \leq \frac{1}{2} k! \cdot \left(2e^{2/e+1}\nu_1\nu_2\right)^k.$$

where in the second inequality we use the Stirling's approximation inequality that  $\sqrt{2\pi k} k^k e^{-k} \leq k!$ . The sub-exponential parameter of  $XY$  can then be determined.  $\square$

**Lemma 7** (Bernstein's inequality). *Suppose  $X$  is a sub-exponential random variable with parameters  $\nu$  and  $\alpha$ .*

$$\Pr[|X - \mathbb{E}X| > t] \leq \begin{cases} 2 \exp\{-t^2/2\nu^2\}, & 0 < t \leq \nu^2/\alpha; \\ 2 \exp\{-t/2\alpha\}, & t > \nu^2/\alpha. \end{cases}$$

The following lemma is a simplified version of Theorem 1.2A in [40] (note that the original form in [40] is one-sided; the two-sided version below can be trivially obtained by considering  $-X_1, \dots, -X_n$  and applying the union bound).

**Lemma 8** (Bernstein's inequality for martingales). *Suppose  $X_1, \dots, X_n$  are random variables such that  $\mathbb{E}[X_j | X_1, \dots, X_{j-1}] = 0$  and  $\mathbb{E}[X_j^2 | X_1, \dots, X_{j-1}] \leq \sigma^2$  for all  $j = 1, \dots, n$ . Further assume that  $\mathbb{E}[|X_j|^k | X_1, \dots, X_{j-1}] \leq \frac{1}{2} k! \sigma^2 b^{k-2}$  for all integers  $k \geq 3$ . Then for all  $t > 0$ ,*

$$\Pr\left[\left|\sum_{j=1}^n X_j\right| \geq t\right] \leq 2 \exp\left\{-\frac{t^2}{2(n\sigma^2 + bt)}\right\}.$$
